# Supplementary material for: Effect of Polymer Nano- and Microparticles on Calcium Carbonate Crystallization
Source: PubMed Central journal article supplement — ACS Omega. 2021 Jul 28;6(31):20522–9. doi: 10.1021/acsomega.1c02564 (PMC8359134; doi:10.1021/acsomega.1c02564), 2021-07-28
Supplement: ao1c02564_si_001.pdf [file ao1c02564_si_001.pdf]

# Effect of Polymer Nano- and Microparticles on Calcium Carbonate Crystallization

Gomathi Mahadevan, Qiu Ruifan, Yap Hui Hian Jane and Suresh Valiyaveetil\*

Department of Chemistry, National University of Singapore, 3 Science Drive 3, Singapore 117543.

## Supporting information

### Contents

|                                                                                                            |    |
|------------------------------------------------------------------------------------------------------------|----|
| 1. DLS data of PNPs                                                                                        | S2 |
| 2. Optical and SEM images of control                                                                       | S2 |
| 3. SEM images of CaCO <sub>3</sub> under influence of different concentration of pristine SDS              | S3 |
| 4. CaCO <sub>3</sub> Optical fluorescence image of CaCO <sub>3</sub> under different concentration of PNPs | S3 |
| 5. FTIR spectrum of CaCO <sub>3</sub> particles obtained at EG/H <sub>2</sub> O ratio of 4:1 at 0.05 M     | S4 |
| 6. FTIR and XRD of green and white particles extracted from the facial scrubber                            | S4 |
| 7. SEM image of CaCO <sub>3</sub> crystals under the influence of Scrubber soap                            | S5 |

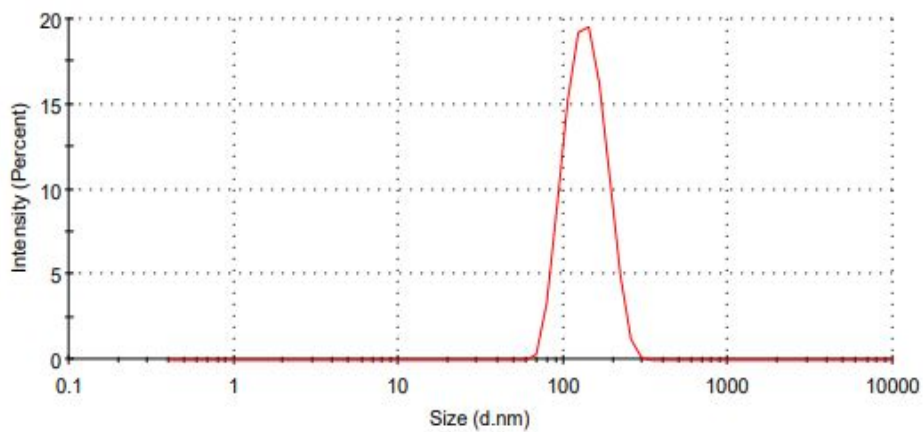

**Figure S1.** DLS data of microplastic prepared from nanoprecipitation and particle size distribution of PMMA NPs

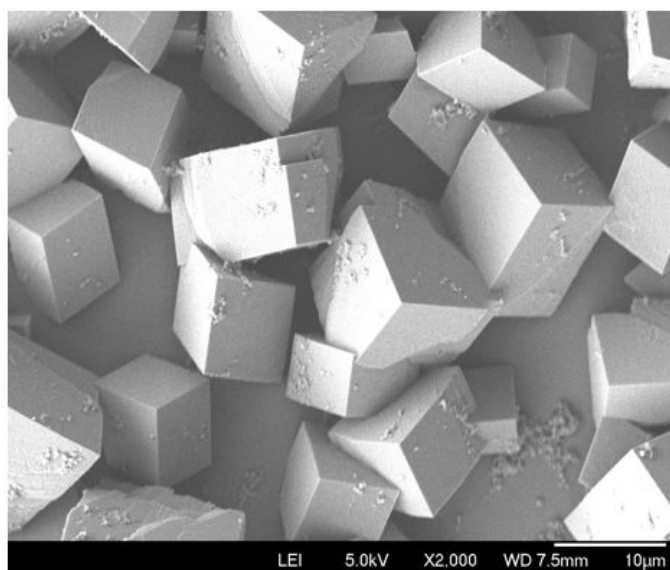

**Figure S2.** SEM micrographs of CaCO<sub>3</sub> crystals nucleated without added polymer nanoparticles or other additives.

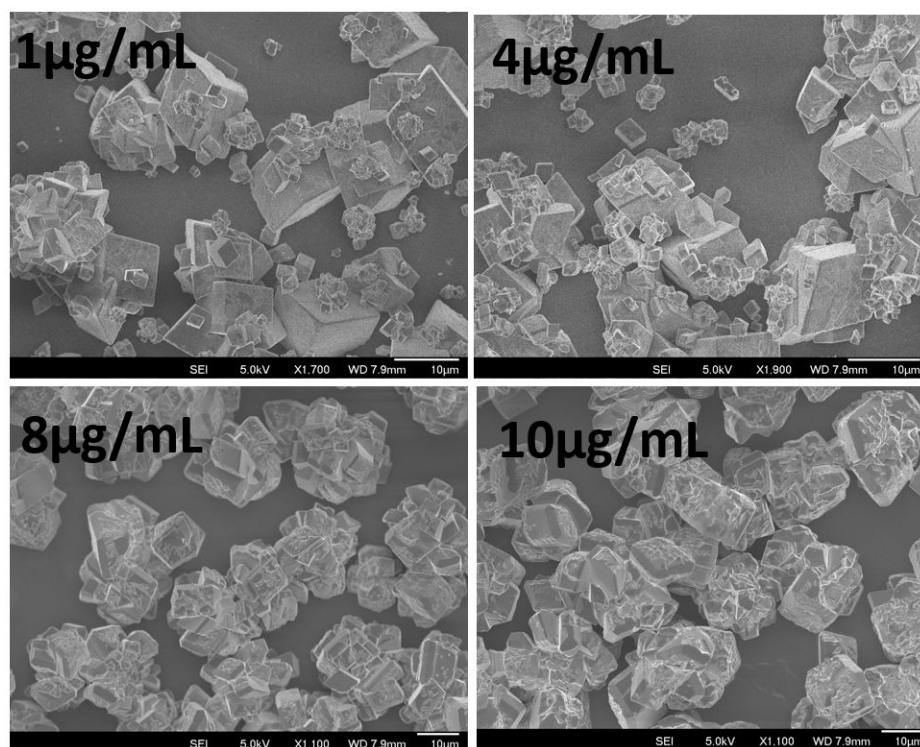

**Figure S3.** SEM images of  $\text{CaCO}_3$  crystals nucleated in presence of different concentrations (1 – 10  $\mu\text{g/mL}$ ) of sodium dodecyl sulfate (SDS) solution. The concentration used as given on the micrograph.

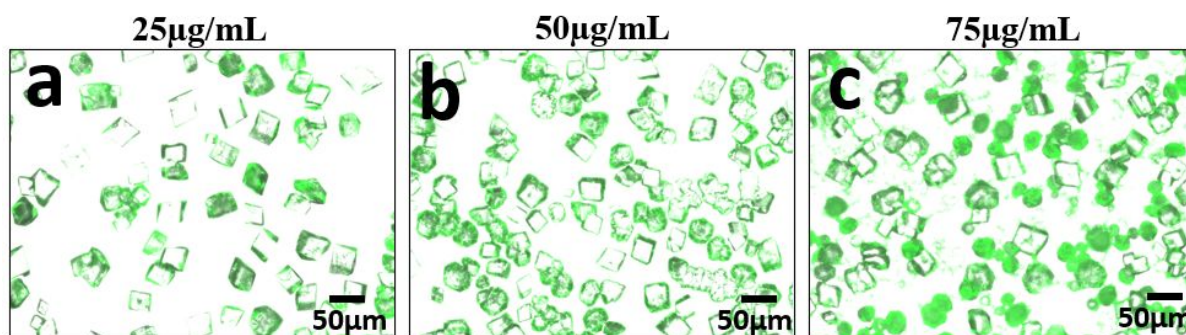

**Figure S4.** Fluorescent microscopic images of  $\text{CaCO}_3$  crystals formed in presence of polymethacrylate nanoparticles (PMMA-NPs) at different concentrations a) 25 $\mu\text{g/mL}$ , b) 50  $\mu\text{g/mL}$  and c) 75  $\mu\text{g/mL}$ .

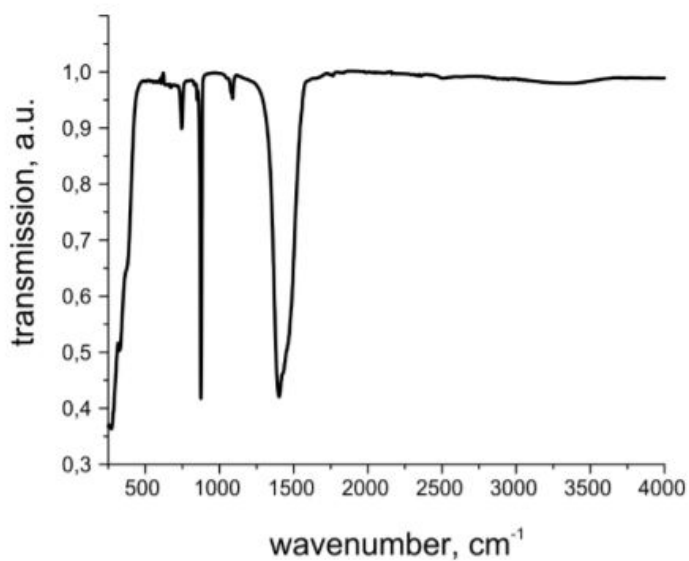

**Figure S5.** The FTIR spectrum of  $\text{CaCO}_3$  particles obtained at EG/ $\text{H}_2\text{O}$  (Ethylene Glycol) ratio of 4:1 at 0.05 M reagent concentrations and  $R_3 = 0.084$  ml/min dropping rate. The bands centered at  $745\text{ cm}^{-1}$  ( $\nu_4$ ),  $878\text{ cm}^{-1}$  ( $\nu_2$ ) and  $1085\text{ cm}^{-1}$  ( $\nu_1$ ) are characteristic for vaterite.<sup>39</sup>

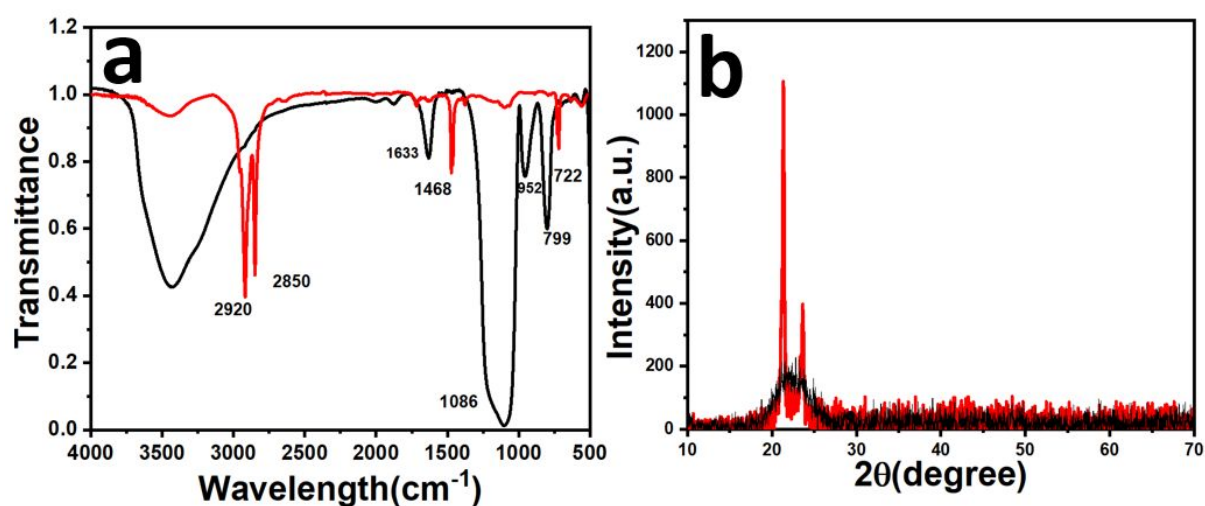

**Figure S6.** FTIR (a) and XRD (b) of green (—) and white (—) particles extracted from the facial scrub.

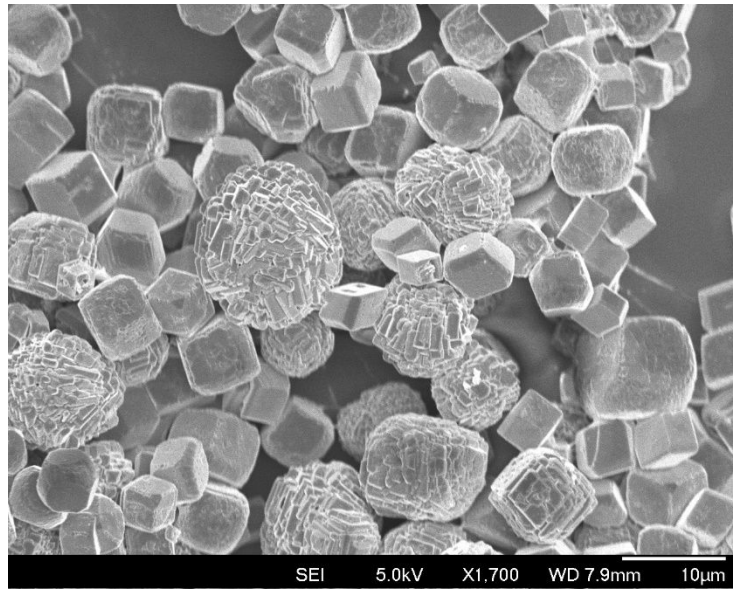

**Figure S7.** SEM image of CaCO<sub>3</sub> crystals nucleated under the influence of aqueous scrub solution.
